# Supplementary material for: Comparing supervised machine learning algorithms for the prediction of partial arterial pressure of oxygen during craniotomy
Source: Research Square preprint supplement (doi:10.21203/rs.3.rs-6455053/v1), 2025-05-05
Supplement: Supplementary file 1 [file 67b39010a3609d75bf8874ff.pdf]

Appendix G: STROBE Statement

Table 1: STROBE Checklist-Checklist of items that should be included in reports of cohort studies

|                      | Item No | Recommendation                                                                                      | Section         |
|----------------------|---------|-----------------------------------------------------------------------------------------------------|-----------------|
| Title and abstract   | 1       | (a) Indicate the study's design with a commonly used term in the title or the abstract              | n.a.            |
|                      |         | (b) Provide in the abstract an informative and balanced summary of what was done and what was found | Title, Abstract |
| Introduction         |         |                                                                                                     |                 |
| Background/rationale | 2       | Explain the scientific background and rationale for the investigation being reported                | 1               |
| Objectives           | 3       | State specific objectives, including any prespecified hypotheses                                    | 1               |
| Methods              |         |                                                                                                     |                 |

Continued on next page.

047 Table 1 – continued from previous page  
048

| 049 |              | Item No | Recommendation            | Section |
|-----|--------------|---------|---------------------------|---------|
| 050 |              |         |                           |         |
| 051 | Study design | 4       | Present key elements of   | 2.1     |
| 052 |              |         | study design early in the |         |
| 053 |              |         | paper                     |         |
| 054 |              |         |                           |         |
| 055 |              |         |                           |         |
| 056 | Setting      | 5       | Describe the setting,     | 2.1     |
| 057 |              |         | locations, and relevant   |         |
| 058 |              |         | dates, including periods  |         |
| 059 |              |         | of recruitment, expo-     |         |
| 060 |              |         | sure, follow-up, and      |         |
| 061 |              |         | data collection           |         |
| 062 |              |         |                           |         |
| 063 |              |         |                           |         |
| 064 |              |         |                           |         |
| 065 |              |         |                           |         |
| 066 | Participants | 6       | (a) Give the eligibil-    | 2.1-2.3 |
| 067 |              |         | ity criteria, and the     |         |
| 068 |              |         | sources and methods       |         |
| 069 |              |         | of selection of partic-   |         |
| 070 |              |         | ipants. Describe meth-    |         |
| 071 |              |         | ods of follow-up          |         |
| 072 |              |         |                           |         |
| 073 |              |         |                           |         |
| 074 |              |         |                           |         |
| 075 |              |         |                           |         |
| 076 |              |         | (b) For matched studies,  | n.a.    |
| 077 |              |         | give matching criteria    |         |
| 078 |              |         | and number of exposed     |         |
| 079 |              |         |                           |         |
| 080 |              |         |                           |         |
| 081 |              |         | and unexposed             |         |

Continued on next page.

Table 1 – continued from previous page

|                           | Item No | Recommendation                                                                                                                                                                       | Section |
|---------------------------|---------|--------------------------------------------------------------------------------------------------------------------------------------------------------------------------------------|---------|
| Variables                 | 7       | Clearly define all outcomes, exposures, predictors, potential confounders, and effect modifiers. Give diagnostic criteria, if applicable                                             | 2.1     |
| Data sources/ measurement | 8       | For each variable of interest, give sources of data and details of methods of assessment (measurement). Describe comparability of assessment methods if there is more than one group | 2.1     |
| Bias                      | 9       | Describe any efforts to address potential sources of bias                                                                                                                            | 2.2-2.6 |
| Study size                | 10      | Explain how the study size was arrived at                                                                                                                                            | 2.1     |

Continued on next page.

139 Table 1 – continued from previous page  
 140

| 141 |                        | Item No | Recommendation                                                                                                               | Section |
|-----|------------------------|---------|------------------------------------------------------------------------------------------------------------------------------|---------|
| 142 |                        |         |                                                                                                                              |         |
| 143 | Quantitative variables | 11      | Explain how quantitative variables were handled in the analyses. If applicable, describe which groupings were chosen and why | n.a.    |
| 144 |                        |         |                                                                                                                              |         |
| 145 |                        |         |                                                                                                                              |         |
| 146 |                        |         |                                                                                                                              |         |
| 147 |                        |         |                                                                                                                              |         |
| 148 |                        |         |                                                                                                                              |         |
| 149 |                        |         |                                                                                                                              |         |
| 150 |                        |         |                                                                                                                              |         |
| 151 |                        |         |                                                                                                                              |         |
| 152 |                        |         |                                                                                                                              |         |
| 153 | Statistical methods    | 12      | (a) Describe all statistical methods, including those used to control for confounding                                        | 2.2-2.6 |
| 154 |                        |         |                                                                                                                              |         |
| 155 |                        |         |                                                                                                                              |         |
| 156 |                        |         |                                                                                                                              |         |
| 157 |                        |         |                                                                                                                              |         |
| 158 |                        |         |                                                                                                                              |         |
| 159 |                        |         |                                                                                                                              |         |
| 160 |                        |         | (b) Describe any methods used to examine subgroups and interactions                                                          | n.a.    |
| 161 |                        |         |                                                                                                                              |         |
| 162 |                        |         |                                                                                                                              |         |
| 163 |                        |         |                                                                                                                              |         |
| 164 |                        |         |                                                                                                                              |         |
| 165 |                        |         |                                                                                                                              |         |
| 166 |                        |         | (c) Explain how missing data were addressed                                                                                  | 2.1     |
| 167 |                        |         |                                                                                                                              |         |
| 168 |                        |         |                                                                                                                              |         |
| 169 |                        |         |                                                                                                                              |         |
| 170 |                        |         | (d) If applicable, explain how loss to follow-up was addressed                                                               | n.a.    |
| 171 |                        |         |                                                                                                                              |         |
| 172 |                        |         |                                                                                                                              |         |
| 173 |                        |         |                                                                                                                              |         |
| 174 |                        |         |                                                                                                                              |         |
| 175 |                        |         | (e) Describe any sensitivity analyses                                                                                        | n.a.    |
| 176 |                        |         |                                                                                                                              |         |
| 177 |                        |         |                                                                                                                              |         |

178 **Results**  
 179

180 Continued on next page.  
 181

182  
 183  
 184

Table 1 – continued from previous page

|                  | Item No | Recommendation                                                                                                                                                                                    | Section    |
|------------------|---------|---------------------------------------------------------------------------------------------------------------------------------------------------------------------------------------------------|------------|
| Participants     | 13      | (a) Report numbers of individuals at each stage of study—eg numbers potentially eligible, examined for eligibility, confirmed eligible, included in the study, completing follow-up, and analyzed | Appendix C |
|                  |         | (b) Give reasons for non-participation at each stage                                                                                                                                              | n.a.       |
|                  |         | (c) Explain how missing data were addressed                                                                                                                                                       | Appendix C |
| Descriptive data | 14      | (a) Give characteristics of study participants (eg demographic, clinical, social) and information on exposures and potential confounders                                                          | 3.1        |
|                  |         | (b) Indicate number of participants with missing data for each variable of interest                                                                                                               | n.a.       |

Continued on next page.

231 Table 1 – continued from previous page  
232

| 233 |              | Item No | Recommendation           | Section |
|-----|--------------|---------|--------------------------|---------|
| 234 |              |         |                          |         |
| 235 |              |         | (c) Summarize follow-up  | n.a.    |
| 236 |              |         | time (eg, average and    |         |
| 237 |              |         | total amount)            |         |
| 238 |              |         |                          |         |
| 239 |              |         |                          |         |
| 240 | Outcome data | 15      | Report numbers of        | 3.1     |
| 241 |              |         | outcome events or sum-   |         |
| 242 |              |         | mary measures over       |         |
| 243 |              |         | time                     |         |
| 244 |              |         |                          |         |
| 245 |              |         |                          |         |
| 246 |              |         |                          |         |
| 247 | Main results | 16      | (a) Give unadjusted      | 3.4-3.5 |
| 248 |              |         | estimates and, if        |         |
| 249 |              |         | applicable, confounder-  |         |
| 250 |              |         | adjusted estimates and   |         |
| 251 |              |         | their precision (eg, 95% |         |
| 252 |              |         | confidence interval).    |         |
| 253 |              |         | Make clear which con-    |         |
| 254 |              |         | founders were adjusted   |         |
| 255 |              |         | for and why they were    |         |
| 256 |              |         | included                 |         |
| 257 |              |         | (b) Report category      | n.a.    |
| 258 |              |         | boundaries when con-     |         |
| 259 |              |         | tinuous variables were   |         |
| 260 |              |         | categorized              |         |
| 261 |              |         |                          |         |
| 262 |              |         |                          |         |
| 263 |              |         |                          |         |
| 264 |              |         |                          |         |
| 265 |              |         |                          |         |
| 266 |              |         |                          |         |
| 267 |              |         |                          |         |
| 268 |              |         |                          |         |
| 269 |              |         |                          |         |

270 Continued on next page.

271  
272  
273  
274  
275  
276

Table 1 – continued from previous page

|                   | Item No | Recommendation                                                                                                                                             | Section |
|-------------------|---------|------------------------------------------------------------------------------------------------------------------------------------------------------------|---------|
|                   |         | (c) If relevant, consider translating estimates of relative risk into absolute risk for a meaningful time period                                           | n.a.    |
| Other analyses    | 17      | Report other analyses done — eg analyses of subgroups and interactions, and sensitivity analyses                                                           | 3.6     |
| <b>Discussion</b> |         |                                                                                                                                                            |         |
| Key results       | 18      | Summarize key results with reference to study objectives                                                                                                   | 4       |
| Limitations       | 19      | Discuss limitations of the study, taking into account sources of potential bias or imprecision. Discuss both direction and magnitude of any potential bias | 4       |

Continued on next page.

Table 1 – continued from previous page

|                          | Item No | Recommendation                                                                                                                                                             | Section      |
|--------------------------|---------|----------------------------------------------------------------------------------------------------------------------------------------------------------------------------|--------------|
| Interpretation           | 20      | Give a cautious overall interpretation of results considering objectives, limitations, multiplicity of analyses, results from similar studies, and other relevant evidence | 4            |
| Generalisability         | 21      | Discuss the generalisability (external validity) of the study results                                                                                                      | 5            |
| <b>Other information</b> |         |                                                                                                                                                                            |              |
| Funding                  | 22      | Give the source of funding and the role of the funders for the present study and, if applicable, for the original study on which the present article is based              | Declarations |
