# Supplementary material for: Comparing supervised machine learning algorithms for the prediction of partial arterial pressure of oxygen during craniotomy
Source: Research Square preprint supplement (doi:10.21203/rs.3.rs-6455053/v1), 2025-05-05
Supplement: Supplementary file 2 [file f7c0e0010b6866f02d2998d1.pdf]

Appendix F: TRIPOD checklist

Table 1: TRIPOD Checklist for Prediction Model Development

| Section/Topic             | Item | Checklist Item                                                                                                                                                                                   | Section  |
|---------------------------|------|--------------------------------------------------------------------------------------------------------------------------------------------------------------------------------------------------|----------|
| Title and abstract        |      |                                                                                                                                                                                                  |          |
| Title                     | 1    | Identify the study as developing and/or validating a multi-variable prediction model, the target population, and the outcome to be predicted.                                                    | Title    |
| Abstract                  | 2    | Provide a summary of objectives, study design, setting, participants, sample size, predictors, outcome, statistical analysis, results, and conclusions.                                          | Abstract |
| Introduction              |      |                                                                                                                                                                                                  |          |
| Background and objectives | 3a   | Explain the medical context (including whether diagnostic or prognostic) and rationale for developing or validating the multivariable prediction model, including references to existing models. | 1        |

Continued on next page.

|     |                                        |             |                                   |                |
|-----|----------------------------------------|-------------|-----------------------------------|----------------|
| 047 | Table 1 – continued from previous page |             |                                   |                |
| 048 |                                        |             |                                   |                |
| 049 | <b>Section/Topic</b>                   | <b>Item</b> | <b>Checklist Item</b>             | <b>Section</b> |
| 050 |                                        |             |                                   |                |
| 051 |                                        | 3b          | Specify the objectives, includ-   | 1              |
| 052 |                                        |             | ing whether the study describes   |                |
| 053 |                                        |             | the development or validation     |                |
| 054 |                                        |             | of the model or both.             |                |
| 055 |                                        |             |                                   |                |
| 056 |                                        |             |                                   |                |
| 057 |                                        |             |                                   |                |
| 058 | <b>Methods</b>                         |             |                                   |                |
| 059 |                                        |             |                                   |                |
| 060 | Source of data                         | 4a          | Describe the study design or      | 2.1            |
| 061 |                                        |             | source of data (e.g., random-     |                |
| 062 |                                        |             | ized trial, cohort, or registry   |                |
| 063 |                                        |             | data), separately for the devel-  |                |
| 064 |                                        |             | opment and validation data        |                |
| 065 |                                        |             | sets, if applicable.              |                |
| 066 |                                        |             |                                   |                |
| 067 |                                        |             |                                   |                |
| 068 |                                        | 4b          | Specify the key study dates,      | 2.1            |
| 069 |                                        |             | including start of accrual; end   |                |
| 070 |                                        |             | of accrual; and, if applicable,   |                |
| 071 |                                        |             | end of follow-up.                 |                |
| 072 |                                        |             |                                   |                |
| 073 |                                        |             |                                   |                |
| 074 |                                        |             |                                   |                |
| 075 |                                        |             |                                   |                |
| 076 |                                        |             |                                   |                |
| 077 | Participants                           | 5a          | Specify key elements of the       | 2.1            |
| 078 |                                        |             | study setting (e.g., primary      |                |
| 079 |                                        |             | care, secondary care, general     |                |
| 080 |                                        |             | population) including number      |                |
| 081 |                                        |             | and location of centres.          |                |
| 082 |                                        |             |                                   |                |
| 083 |                                        |             |                                   |                |
| 084 |                                        |             |                                   |                |
| 085 |                                        | 5b          | Describe eligibility criteria for | 2.3            |
| 086 |                                        |             | participants.                     |                |
| 087 |                                        |             |                                   |                |
| 088 |                                        |             |                                   |                |
| 089 | Continued on next page.                |             |                                   |                |
| 090 |                                        |             |                                   |                |
| 091 |                                        |             |                                   |                |
| 092 |                                        |             |                                   |                |

Table 1 – continued from previous page

| Section/Topic | Item | Checklist Item                                                                                                                                | Section |
|---------------|------|-----------------------------------------------------------------------------------------------------------------------------------------------|---------|
|               | 5c   | Give details of treatments received, if relevant.                                                                                             | n.a.    |
| Outcome       | 6a   | Clearly define the outcome that is predicted by the prediction model, including how and when assessed.                                        | 2.1     |
|               | 6b   | Report any actions to blind assessment of the outcome to be predicted.                                                                        | n.a.    |
| Predictors    | 7a   | Clearly define all predictors used in developing or validating the multivariable prediction model, including how and when they were measured. | 2.3-2.6 |
|               | 7b   | Report any actions to blind assessment of predictors for the outcome and other predictors.                                                    | n.a.    |
| Sample size   | 8    | Explain how the study size was arrived at.                                                                                                    | 2.1     |

Continued on next page.

Table 1 – continued from previous page

| Section/Topic                | Item | Checklist Item                                                                                                                                       | Section |
|------------------------------|------|------------------------------------------------------------------------------------------------------------------------------------------------------|---------|
| Missing data                 | 9    | Describe how missing data were handled (e.g., complete-case analysis, single imputation, multiple imputation) with details of any imputation method. | 2.1     |
| Statistical analysis methods | 10a  | Describe how predictors were handled in the analyses.                                                                                                | 2.3-2.6 |
|                              | 10b  | Specify type of model, all model-building procedures (including any predictor selection), and method for internal validation.                        | 2.4-2.6 |
|                              | 10c  | Specify all measures used to assess model performance and, if relevant, to compare multiple models.                                                  | 2.5-2.6 |
| Risk groups                  | 11   | Provide details on how risk groups were created, if done.                                                                                            | n.a.    |
| <b>Results</b>               |      |                                                                                                                                                      |         |

Continued on next page.

Table 1 – continued from previous page

| Section/Topic     | Item | Checklist Item                                                                                                                                                                                        | Section |
|-------------------|------|-------------------------------------------------------------------------------------------------------------------------------------------------------------------------------------------------------|---------|
| Participants      | 13a  | Describe the flow of participants through the study, including the number of participants with and without the outcome and, if applicable, a summary of the follow-up time. A diagram may be helpful. | 3.1     |
|                   | 13b  | Describe the characteristics of the participants (basic demographics, clinical features, available predictors), including the number of participants with missing data for predictors and outcome.    | 3.1     |
| Model development | 14a  | Specify the number of participants and outcome events in each analysis.                                                                                                                               | 3.1     |
|                   | 14b  | If done, report the unadjusted association between each candidate predictor and outcome.                                                                                                              | n.a.    |

Continued on next page.

Table 1 – continued from previous page

| Section/Topic       | Item | Checklist Item                                                                                                                                                              | Section |
|---------------------|------|-----------------------------------------------------------------------------------------------------------------------------------------------------------------------------|---------|
| Model specification | 15a  | Present the full prediction model to allow predictions for individuals (i.e., all regression coefficients, and model intercept or baseline survival at a given time point). | 3.4     |
|                     | 15b  | Explain how to use the prediction model.                                                                                                                                    | n.a.    |
|                     | 16   | Report performance measures (with CIs) for the prediction model.                                                                                                            | 3.4-3.6 |
|                     |      |                                                                                                                                                                             |         |
| <b>Discussion</b>   |      |                                                                                                                                                                             |         |
| Limitations         | 18   | Discuss any limitations of the study (such as nonrepresentative sample, few events per predictor, missing data).                                                            | 4       |
| Interpretation      | 19b  | Give an overall interpretation of the results, considering objectives, limitations, and results from similar studies, and other relevant evidence.                          | 4       |

Continued on next page.

|                                        |             |                                                                                                                               |                |     |
|----------------------------------------|-------------|-------------------------------------------------------------------------------------------------------------------------------|----------------|-----|
| Table 1 – continued from previous page |             |                                                                                                                               |                | 277 |
|                                        |             |                                                                                                                               |                | 278 |
| <b>Section/Topic</b>                   | <b>Item</b> | <b>Checklist Item</b>                                                                                                         | <b>Section</b> | 279 |
| Implications                           | 20          | Discuss the potential clinical use of the model and implications for future research.                                         | 4              | 280 |
|                                        |             |                                                                                                                               |                | 281 |
|                                        |             |                                                                                                                               |                | 282 |
|                                        |             |                                                                                                                               |                | 283 |
|                                        |             |                                                                                                                               |                | 284 |
|                                        |             |                                                                                                                               |                | 285 |
| <b>Other information</b>               |             |                                                                                                                               |                | 286 |
|                                        |             |                                                                                                                               |                | 287 |
| Supplementary information              | 21          | Provide information about the availability of supplementary resources, such as study protocol, Web calculator, and data sets. | Declarations   | 288 |
|                                        |             |                                                                                                                               |                | 289 |
|                                        |             |                                                                                                                               |                | 290 |
|                                        |             |                                                                                                                               |                | 291 |
|                                        |             |                                                                                                                               |                | 292 |
|                                        |             |                                                                                                                               |                | 293 |
|                                        |             |                                                                                                                               |                | 294 |
|                                        |             |                                                                                                                               |                | 295 |
|                                        |             |                                                                                                                               |                | 296 |
| Funding                                | 22          | Give the source of funding and the role of the funders for the present study.                                                 | Declarations   | 297 |
|                                        |             |                                                                                                                               |                | 298 |
|                                        |             |                                                                                                                               |                | 299 |
|                                        |             |                                                                                                                               |                | 300 |
|                                        |             |                                                                                                                               |                | 301 |
|                                        |             |                                                                                                                               |                | 302 |
|                                        |             |                                                                                                                               |                | 303 |
|                                        |             |                                                                                                                               |                | 304 |
|                                        |             |                                                                                                                               |                | 305 |
|                                        |             |                                                                                                                               |                | 306 |
|                                        |             |                                                                                                                               |                | 307 |
|                                        |             |                                                                                                                               |                | 308 |
|                                        |             |                                                                                                                               |                | 309 |
|                                        |             |                                                                                                                               |                | 310 |
|                                        |             |                                                                                                                               |                | 311 |
|                                        |             |                                                                                                                               |                | 312 |
|                                        |             |                                                                                                                               |                | 313 |
|                                        |             |                                                                                                                               |                | 314 |
|                                        |             |                                                                                                                               |                | 315 |
|                                        |             |                                                                                                                               |                | 316 |
|                                        |             |                                                                                                                               |                | 317 |
|                                        |             |                                                                                                                               |                | 318 |
|                                        |             |                                                                                                                               |                | 319 |
|                                        |             |                                                                                                                               |                | 320 |
|                                        |             |                                                                                                                               |                | 321 |
|                                        |             |                                                                                                                               |                | 322 |
